# Supplementary material for: Family-centered music therapy—Empowering premature infants and their primary caregivers through music: Results of a pilot study
Source: PubMed Central journal article supplement (PMC8121291; doi:10.1371/journal.pone.0250071), 2021-05-14
Supplement: pone.0250071.s003.pdf [file pone.0250071.s003.pdf]

**S3a Table. Minimal Dataset Physiological Development Infants**

| No. | random | sex | GA  | weight_birth | length_birth | HC_birth | age mother | length of stay | GA_discharge | weight_discharge | length_discharge | HC_discharge | cafein | tube-feed | MT Session |
|-----|--------|-----|-----|--------------|--------------|----------|------------|----------------|--------------|------------------|------------------|--------------|--------|-----------|------------|
| 21  | 2      | 1   | 181 | 580          | 31,5         | 21,0     | 31         | 105            | 285          | 2620             | 45,0             | 32,5         | 86     | 101       | 0          |
| 24  | 2      | 2   | 164 | 530          | 30,0         | 20,5     | 19         | 112            | 289          | 2350             | 43,0             | 30,0         | 99     | 101       | 0          |
| 22  | 2      | 2   | 175 | 710          | 32,0         | 22,3     | 31         | 104            | 278          | 2655             | 46,0             | 34,0         | 95     | 98        | 0          |
| 13  | 2      | 2   | 162 | 340          | 27,0         | 19,6     | 37         | 122            | 283          | 2870             | 46,0             | 32,0         | 84     | 113       | 0          |
| 47  | 2      | 2   | 209 | 1650         | 44,0         | 30,0     | 38         | 36             | 244          | 2220             | 45,0             | 32,0         | 18     | 32        | 0          |
| 51  | 1      | 1   | 206 | 1130         | 38,5         | 26,3     | 33         | 45             | 250          | 2340             | 43,0             | 31,0         | 32     | 41        | 6          |
| 43  | 1      | 2   | 210 | 960          | 37,0         | 26,0     | 31         | 89             | 294          | 2255             | 45,5             | 31,5         | 80     | 86        | 16         |
| 25  | 2      | 2   | 206 | 980          | 36,0         | 27,0     | 39         | 88             | 263          | 2050             | 43,0             | 32,5         | 42     | 48        | 0          |
| 57  | 2      | 2   | 185 | 810          | 34,5         | 24,0     | 26         | 89             | 273          | 2500             | 44,0             | 33,5         | 78     | 84        | 0          |
| 55  | 1      | 1   | 190 | 1110         | 38,0         | 25,5     | 40         | 62             | 251          | 2400             | 45,0             | 32,5         | 39     | 50        | 9          |
| 42  | 2      | 1   | 187 | 720          | 33,0         | 23,3     | 38         | 73             | 259          | 2200             | 41,0             | 31,0         | 66     | 64        | 0          |
| 14  | 2      | 1   | 183 | 730          | 34,0         | 23,3     | 39         | 82             | 264          | 2400             | 43,0             | 31,6         | 62     | 74        | 0          |
| 53  | 2      | 1   | 188 | 900          | 30,5         | 24,3     | 20         | 81             | 268          | 2720             | 43,0             | 31,5         | 68     | 72        | 0          |
| 61  | 2      | 1   | 174 | 450          | 28,0         | 20,8     | 47         | 98             | 271          | 2250             | 43,0             | 30,5         | 76     | 87        | 0          |
| 16  | 1      | 1   | 201 | 1080         | 37,0         | 26,5     | 31         | 58             | 258          | 2190             | 45,0             | 32,0         | 42     | 49        | 8          |
| 44  | 1      | 1   | 210 | 1580         | 42,0         | 29,3     | 31         | 61             | 270          | 2760             | 49,0             | 34,5         | 31     | 51        | 9          |
| 12  | 1      | 2   | 195 | 990          | 37,0         | 25,0     | 24         | 64             | 258          | 2890             | 48,0             | 33,5         | 57     | 60        | 12         |
| 32  | 2      | 2   | 194 | 1190         | 39,0         | 27,0     | 32         | 93             | 286          | 3380             | 51,5             | 35,0         | 75     | 85        | 0          |
| 58  | 1      | 2   | 192 | 1010         | 37,0         | 26,2     | 37         | 72             | 263          | 2570             | 46,0             | 32,5         | 65     | 66        | 12         |
| 45  | 1      | 1   | 199 | 720          | 33,5         | 23,3     | 35         | 86             | 284          | 2415             | 42,5             | 31,6         | 71     | 83        | 17         |
| 18  | 1      | 1   | 186 | 640          | 34,0         | 22,0     | 31         | 96             | 281          | 2390             | 45,5             | 32,0         | 77     | 81        | 16         |
| 52  | 2      | 2   | 198 | 1360         | 37,0         | 26,0     | 42         | 48             | 245          | 2615             | 46,0             | 30,8         | 32     | 40        | 0          |
| 20  | 1      | 2   | 196 | 1450         | 41,0         | 26,5     | 37         | 60             | 255          | 2710             | 47,0             | 31,7         | 39     | 49        | 9          |
| 34  | 2      | 2   | 204 | 570          | 30,0         | 23,3     | 31         | 72             | 275          | 1980             | 40,5             | 32,5         | 41     | 65        | 0          |
| 64  | 1      | 2   | 194 | 950          | 36,0         | 26,0     | 26         | 82             | 274          | 2740             | 47,0             | 33,7         | 70     | 76        | 14         |

|    |   |   |     |      |      |      |    |     |     |      |      |      |    |     |    |
|----|---|---|-----|------|------|------|----|-----|-----|------|------|------|----|-----|----|
| 11 | 1 | 2 | 195 | 1160 | 36,0 | 22,5 | 30 | 68  | 262 | 2630 | 43,5 | 33,0 | 48 | 60  | 13 |
| 49 | 1 | 1 | 204 | 870  | 36,5 | 25,0 | 44 | 55  | 253 | 2640 | 43,0 | 32,5 | 28 | 50  | 9  |
| 23 | 1 | 2 | 199 | 1740 | 44,0 | 29,8 | 41 | 47  | 245 | 2975 | 49,0 | 34,0 | 19 | 41  | 6  |
| 48 | 1 | 2 | 210 | 1770 | 43,0 | 29,9 | 28 | 36  | 247 | 2610 | 48,5 | 33,6 | 29 | 33  | 7  |
| 19 | 1 | 1 | 196 | 820  | 32,0 | 24,0 | 40 | 76  | 271 | 2235 | 43,0 | 32,1 | 65 | 69  | 12 |
| 27 | 1 | 1 | 192 | 870  | 32,0 | 23,0 | 27 | 79  | 270 | 2395 | 45,0 | 31,5 | 71 | 73  | 14 |
| 10 | 1 | 2 | 195 | 1360 | 38,0 | 27,4 | 30 | 64  | 258 | 2910 | 46,0 | 33,5 | 48 | 55  | 13 |
| 39 | 2 | 2 | 195 | 1160 | 38,0 | 27,5 | 19 | 67  | 261 | 2680 | 46,0 | 34,0 | 33 | 62  | 0  |
| 41 | 2 | 1 | 183 | 520  | 30,0 | 22,7 | 37 | 91  | 273 | 2575 | 45,0 | 32,5 | 82 | 85  | 0  |
| 60 | 2 | 2 | 202 | 1480 | 42,0 | 28,5 | 38 | 59  | 260 | 2690 | 48,0 | 35,0 | 37 | 50  | 0  |
| 35 | 2 | 2 | 209 | 960  | 38,0 | 25,5 | 34 | 66  | 274 | 2100 | 42,0 | 32,5 | 43 | 49  | 0  |
| 36 | 1 | 1 | 198 | 1050 | 37,5 | 26,0 | 28 | 69  | 266 | 2375 | 43,0 | 33,2 | 46 | 63  | 10 |
| 59 | 2 | 1 | 202 | 1110 | 38,0 | 26,0 | 38 | 59  | 260 | 2315 | 45,0 | 33,0 | 37 | 49  | 0  |
| 54 | 2 | 2 | 174 | 820  | 34,0 | 23,5 | 36 | 104 | 277 | 3170 | 46,0 | 33,5 | 97 | 91  | 0  |
| 63 | 2 | 2 | 182 | 860  | 34,0 | 23,5 | 36 | 78  | 259 | 2435 | 47,0 | 32,0 | 61 | 68  | 0  |
| 38 | 1 | 1 | 188 | 950  | 36,0 | 24,0 | 29 | 77  | 264 | 2495 | 46,0 | 34,0 | 68 | 69  | 16 |
| 30 | 1 | 2 | 173 | 395  | 27,0 | 19,5 | 36 | 135 | 301 | 2580 | 46,0 | 33,5 | 88 | 132 | 11 |
| 46 | 2 | 2 | 210 | 920  | 33,0 | 24,7 | 38 | 57  | 266 | 2150 | 42,0 | 31,2 | 43 | 52  | 0  |
| 33 | 1 | 2 | 198 | 1490 | 40,0 | 27,0 | 40 | 53  | 250 | 2800 | 46,0 | 32,5 | 31 | 39  | 6  |
| 15 | 2 | 2 | 163 | 490  | 29,0 | 20,2 | 41 | 149 | 308 | 3790 | 50,0 | 35,5 | 94 | 135 | 0  |
| 29 | 1 | 2 | 194 | 990  | 37,5 | 25,0 | 35 | 62  | 255 | 2480 | 43,0 | 32,0 | 46 | 58  | 9  |
| 31 | 2 | 2 | 194 | 1200 | 36,0 | 26,2 | 32 | 89  | 282 | 3525 | 50,0 | 35,0 | 60 | 65  | 0  |
| 56 | 1 | 1 | 190 | 645  | 31,5 | 23,8 | 40 | 103 | 287 | 2670 | 44,0 | 33,5 | 93 | 99  | 14 |
| 17 | 2 | 2 | 176 | 750  | 31,5 | 22,5 | 43 | 123 | 294 | 3130 | 46,0 | 34,0 | 95 | 116 | 0  |
| 62 | 2 | 1 | 174 | 540  | 29,0 | 21,0 | 47 | 98  | 271 | 2300 | 43,0 | 31,5 | 75 | 88  | 0  |

Note: random: 1 = Music therapy group; 2 = Control group; sex: 1 = female; 2 = male; GA = gestational age; HC = head circumference; MT = Music therapy

**S3b Table. Minimal Dataset Maternal Stress Factors**

| No. | random | sex | T1 Stress | T1 Resources | T1 StateAnxiety | T1 TraitAnxiety | T1 Depression | T1 Skills | T2 Stress | T2 Resources | T2 StateAnxiety | T2 TraitAnxiety | T2 Depression | T2 Skills |
|-----|--------|-----|-----------|--------------|-----------------|-----------------|---------------|-----------|-----------|--------------|-----------------|-----------------|---------------|-----------|
| 21  | 2      | 1   | 22,00     | 17,00        | 37,00           | 31,00           | 16,00         | 13,00     | 17,00     | 19,00        | 37,00           | 33,00           | 9,00          | 12,00     |
| 50  | 2      | 2   | 17,00     | 18,00        | 43,00           | 39,00           | 13,00         | 18,00     | 17,00     | 16,00        | 47,00           | 50,00           | 18,00         | 22,00     |
| 24  | 2      | 2   | 16,00     | 16,00        | 47,00           | 48,89           | 11,00         | 18,00     | 23,00     | 9,00         | 35,00           | 29,00           | 13,00         | 15,00     |
| 22  | 2      | 2   | 19,00     | 16,00        | 44,00           | 39,00           | 6,00          | 26,00     | 17,00     | 17,00        | 39,00           | 37,00           | 3,00          | 20,00     |
| 47  | 2      | 2   | 17,00     | 20,00        | 33,00           | 27,00           | 4,00          | 8,00      | 18,00     | 21,00        | 37,00           | 22,00           | 2,00          | 8,00      |
| 51  | 1      | 1   | 16,00     | 20,00        | 45,00           | 39,00           | 18,00         | 18,00     | 18,00     | 20,00        | 36,00           | 37,00           | 14,00         | 11,00     |
| 43  | 1      | 2   | 18,00     | 20,00        | 46,50           | 41,50           | 14,00         | 17,00     | 20,00     | 19,00        | 43,50           | 42,00           | 14,00         | 14,00     |
| 25  | 2      | 2   | 21,00     | 19,00        | 29,00           | 30,00           | 1,00          | 16,00     | 22,00     | 18,00        | 32,00           | 28,00           | 3,00          | 14,00     |
| 57  | 2      | 2   | 20,00     | 19,00        | 44,00           | 34,00           | 7,00          | 15,00     | 20,00     | 21,00        | 38,00           | 34,00           | 1,00          | 13,00     |
| 55  | 1      | 1   | 17,00     | 18,00        | 49,00           | 39,00           | 15,00         | 17,00     | 15,00     | 19,00        | 54,00           | 51,00           | 8,00          | 18,00     |
| 42  | 2      | 1   | 23,87     | 20,00        | 57,00           | 62,00           | 17,00         | 28,00     | 22,80     | 21,00        | 64,00           | 65,00           | 13,00         | 29,00     |
| 53  | 2      | 1   | 20,00     | 21,00        | 44,00           | 44,00           | 16,00         | 19,00     | 21,00     | 19,00        | 45,00           | 37,00           | 13,00         | 17,00     |
| 61  | 2      | 1   | 24,00     | 11,00        | 59,00           | 57,00           | 12,00         | 17,00     | 23,00     | 14,00        | 54,00           | 53,00           | 10,00         | 19,00     |
| 16  | 1      | 1   | 20,00     | 20,00        | 48,00           | 40,00           | 7,00          | 13,00     | 18,00     | 21,00        | 39,00           | 32,00           | 7,00          | 13,00     |
| 44  | 1      | 1   | 20,00     | 20,00        | 46,50           | 41,50           | 14,00         | 17,00     | 23,00     | 19,00        | 46,00           | 39,50           | 13,00         | 15,00     |
| 12  | 1      | 2   | 24,00     | 19,00        | 51,00           | 44,00           | 13,00         | 21,75     | 21,00     | 19,00        | 53,00           | 41,00           | 13,00         | 14,00     |
| 32  | 2      | 2   | 23,00     | 16,00        | 60,00           | 61,00           | 16,00         | 30,00     | 21,00     | 17,00        | 57,00           | 58,00           | 9,00          | 17,00     |
| 58  | 1      | 2   | 21,00     | 21,00        | 39,00           | 31,00           | 6,00          | 12,00     | 18,00     | 19,00        | 40,00           | 35,00           | 6,00          | 14,00     |
| 45  | 1      | 1   | 21,00     | 21,00        | 40,00           | 39,00           | 6,00          | 18,00     | 19,00     | 21,00        | 43,00           | 41,00           | 9,00          | 15,00     |
| 18  | 1      | 1   | 19,00     | 16,00        | 70,00           | 58,00           | 23,00         | 19,00     | 20,00     | 21,00        | 65,00           | 55,00           | 20,00         | 15,00     |
| 52  | 2      | 2   | 24,00     | 21,00        | 48,00           | 27,00           | 12,00         | 21,42     | 19,00     | 21,00        | 38,00           | 28,00           | 2,00          | 13,00     |
| 20  | 1      | 2   | 17,00     | 18,00        | 41,00           | 38,00           | 14,00         | 22,60     | 15,00     | 20,00        | 31,00           | 41,00           | 14,00         | 13,00     |
| 34  | 2      | 2   | 20,00     | 17,00        | 43,00           | 45,00           | 7,00          | 25,00     | 20,00     | 17,00        | 45,00           | 39,00           | 5,00          | 17,00     |
| 64  | 1      | 2   | 21,00     | 20,00        | 45,00           | 41,00           | 12,00         | 19,41     | 16,00     | 19,00        | 37,00           | 34,00           | 5,00          | 15,17     |
| 11  | 1      | 2   | 22,00     | 18,00        | 47,00           | 36,00           | 7,00          | 13,00     | 19,00     | 19,00        | 35,00           | 29,00           | 3,00          | 13,00     |
| 49  | 1      | 1   | 23,00     | 18,00        | 53,00           | 51,59           | 15,00         | 21,00     | 19,80     | 16,00        | 57,00           | 51,00           | 17,00         | 18,00     |

|    |   |   |       |       |       |       |       |       |       |       |       |       |       |       |
|----|---|---|-------|-------|-------|-------|-------|-------|-------|-------|-------|-------|-------|-------|
| 48 | 1 | 2 | 14,00 | 21,00 | 38,00 | 29,00 | 9,00  | 23,00 | 14,00 | 22,00 | 39,00 | 32,00 | 8,00  | 16,00 |
| 19 | 1 | 1 | 22,00 | 19,00 | 49,00 | 42,00 | 13,00 | 18,00 | 19,00 | 21,00 | 44,00 | 36,00 | 4,00  | 13,00 |
| 27 | 1 | 1 | 26,00 | 18,00 | 53,00 | 55,00 | 25,00 | 16,00 | 24,00 | 21,00 | 50,00 | 45,00 | 11,00 | 15,00 |
| 10 | 1 | 2 | 22,00 | 18,00 | 47,00 | 36,00 | 7,00  | 13,00 | 19,00 | 20,00 | 36,00 | 29,00 | 1,00  | 13,00 |
| 39 | 2 | 2 | 20,60 | 19,59 | 47,00 | 41,00 | 11,00 | 14,00 | 20,00 | 20,00 | 45,00 | 37,00 | 8,00  | 15,00 |
| 41 | 2 | 1 | 18,00 | 20,00 | 38,00 | 35,00 | 6,00  | 16,00 | 19,00 | 21,00 | 32,00 | 39,00 | 11,00 | 11,00 |
| 60 | 2 | 2 | 17,00 | 21,00 | 40,00 | 34,00 | 6,00  | 8,00  | 18,00 | 21,00 | 37,00 | 26,00 | 4,00  | 8,00  |
| 35 | 2 | 2 | 19,00 | 17,00 | 38,00 | 40,00 | 12,00 | 18,00 | 17,00 | 19,00 | 48,00 | 45,00 | 13,00 | 13,00 |
| 59 | 2 | 1 | 20,00 | 21,00 | 38,00 | 33,00 | 6,00  | 8,00  | 18,00 | 21,00 | 37,00 | 26,00 | 4,00  | 8,00  |
| 54 | 2 | 2 | 27,00 | 20,00 | 50,00 | 39,00 | 12,00 | 14,00 | 19,00 | 21,00 | 38,00 | 36,00 | 10,00 | 9,00  |
| 63 | 2 | 2 | 24,00 | 16,00 | 55,00 | 56,00 | 18,00 | 16,00 | 20,00 | 18,00 | 56,00 | 49,00 | 15,00 | 12,00 |
| 38 | 1 | 1 | 27,00 | 20,00 | 54,00 | 51,00 | 17,00 | 21,00 | 24,00 | 16,00 | 49,00 | 39,00 | 7,00  | 17,00 |
| 30 | 1 | 2 | 23,00 | 21,00 | 44,00 | 41,52 | 15,00 | 12,00 | 22,80 | 19,00 | 47,00 | 40,00 | 14,00 | 16,00 |
| 46 | 2 | 2 | 19,00 | 20,00 | 37,00 | 30,00 | 9,00  | 14,00 | 19,00 | 21,00 | 33,00 | 30,00 | 5,00  | 9,00  |
| 37 | 1 | 2 | 26,00 | 19,00 | 50,00 | 47,00 | 9,00  | 17,00 | 22,00 | 20,00 | 42,00 | 39,00 | 5,00  | 11,00 |
| 33 | 1 | 2 | 17,00 | 17,00 | 48,00 | 53,00 | 18,00 | 26,00 | 17,00 | 20,00 | 34,00 | 33,00 | 10,02 | 13,00 |
| 15 | 2 | 2 | 25,78 | 14,00 | 62,00 | 59,00 | 16,00 | 23,00 | 24,00 | 20,00 | 46,00 | 42,00 | 4,00  | 23,00 |
| 29 | 1 | 2 | 23,00 | 20,00 | 47,00 | 48,00 | 16,00 | 17,00 | 18,00 | 21,00 | 37,00 | 41,00 | 10,00 | 9,00  |
| 31 | 2 | 2 | 23,00 | 16,00 | 60,00 | 61,00 | 16,00 | 30,00 | 21,00 | 17,00 | 57,00 | 58,00 | 9,00  | 17,00 |
| 56 | 1 | 1 | 21,00 | 18,00 | 49,00 | 38,89 | 15,00 | 19,00 | 15,00 | 19,00 | 54,00 | 51,00 | 8,00  | 18,00 |
| 62 | 2 | 1 | 25,00 | 10,00 | 56,00 | 56,00 | 12,00 | 16,00 | 21,00 | 14,00 | 54,00 | 53,00 | 10,00 | 19,00 |

Note: random: 1 = Music therapy group; 2 = Control group; sex: 1 = female; 2 = male; \* = missing data

**S3c Table. Minimal Dataset Paternal Stress Factors**

| No. | random | sex | T1_Stress | T1_Resources | T1_StateAnxiety | T1_TraitAnxiety | T1_Skills | T2_Stress | T2_Resources | T2_StateAnxiety | T2_TraitAnxiety | T2_Skills |
|-----|--------|-----|-----------|--------------|-----------------|-----------------|-----------|-----------|--------------|-----------------|-----------------|-----------|
| 40  | 2      | 1   | 23,00     | 20,00        | 99*             | 99*             | 99*       | 22,00     | 21,00        | 99*             | 99*             | 99*       |
| 21  | 2      | 1   | 21,00     | 18,00        | 54,00           | 46,72           | 14,00     | 18,00     | 19,39*       | 44,53           | 40,00           | 15,00     |
| 24  | 2      | 2   | 23,00     | 17,00        | 38,00           | 29,00           | 33,00     | 20,00     | 9,00         | 41,51           | 26,00           | 8,00      |
| 22  | 2      | 2   | 18,00     | 17,00        | 40,00           | 33,00           | 16,00     | 17,00     | 18,39        | 23,53           | 22,00           | 12,00     |
| 51  | 1      | 1   | 16,00     | 19,00        | 31,00           | 27,00           | 13,00     | 14,00     | 19,39        | 28,00           | 22,00           | 11,00     |
| 43  | 1      | 2   | 99*       | 99*          | 41,00           | 34,00           | 21,65     | 99*       | 99*          | 47,00           | 35,00           | 10,00     |
| 25  | 2      | 2   | 24,00     | 17,00        | 52,00           | 46,00           | 21,00     | 21,00     | 18,00        | 35,00           | 45,00           | 19,00     |
| 57  | 2      | 2   | 20,00     | 21,00        | 46,00           | 36,00           | 13,00     | 21,00     | 23,00        | 46,00           | 39,00           | 14,00     |
| 55  | 1      | 1   | 21,00     | 19,00        | 53,00           | 53,00           | 17,00     | 21,00     | 18,00        | 51,00           | 54,00           | 20,00     |
| 42  | 2      | 1   | 21,00     | 19,00        | 48,00           | 46,00           | 15,00     | 21,00     | 18,00        | 41,00           | 40,49           | 11,00     |
| 53  | 2      | 1   | 20,00     | 17,00        | 38,00           | 40,72           | 23,00     | 17,00     | 16,39        | 43,53           | 46,00           | 28,00     |
| 16  | 1      | 1   | 18,00     | 20,00        | 43,00           | 37,00           | 18,00     | 16,00     | 20,39        | 29,00           | 27,00           | 15,00     |
| 44  | 1      | 1   | 99*       | 99*          | 41,00           | 35,00           | 21,65     | 99*       | 99*          | 44,00           | 39,00           | 15,89     |
| 12  | 1      | 2   | 22,00     | 17,00        | 40,00           | 42,00           | 99*       | 16,00     | 18,39*       | 36,53           | 34,00           | 99*       |
| 32  | 2      | 2   | 21,00     | 16,00        | 27,00           | 24,00           | 17,00     | 17,00     | 16,39        | 28,53           | 23,00           | 10,00     |
| 45  | 1      | 1   | 17,72*    | 16,00        | 43,00           | 40,00           | 23,00     | 20,00     | 18,00        | 45,00           | 34,00           | 25,00     |
| 18  | 1      | 1   | 25,00     | 18,00        | 53,00           | 46,00           | 20,00     | 20,00     | 16,00        | 50,00           | 41,00           | 16,00     |
| 20  | 1      | 2   | 15,00     | 20,00        | 34,00           | 26,00           | 19,00     | 14,00     | 17,00        | 29,00           | 26,00           | 14,00     |
| 34  | 2      | 2   | 19,00     | 18,27*       | 26,00           | 24,00           | 11,00     | 17,00     | 18,39*       | 28,00           | 21,00           | 11,00     |
| 64  | 1      | 2   | 19,00     | 19,00        | 33,00           | 22,00           | 15,09     | 21,00     | 18,00        | 27,00           | 24,00           | 14,00     |
| 11  | 1      | 2   | 17,00     | 21,00        | 33,00           | 28,00           | 9,00      | 17,00     | 21,00        | 26,00           | 24,00           | 10,00     |
| 49  | 1      | 1   | 23,00     | 21,00        | 38,00           | 33,00           | 12,00     | 19,00     | 21,39        | 35,53           | 34,00           | 10,00     |
| 48  | 1      | 2   | 18,00     | 18,00        | 32,00           | 31,00           | 24,00     | 16,00     | 18,00        | 40,00           | 33,00           | 28,00     |
| 19  | 1      | 1   | 21,00     | 20,00        | 44,00           | 38,00           | 12,00     | 19,00     | 19,00        | 47,00           | 35,00           | 16,00     |
| 27  | 1      | 1   | 22,00     | 19,00        | 45,00           | 37,00           | 18,00     | 21,00     | 20,00        | 43,00           | 41,00           | 19,00     |
| 10  | 1      | 2   | 17,00     | 18,00        | 33,00           | 27,72           | 9,00      | 17,00     | 20,39        | 25,53           | 24,00           | 10,00     |

|    |   |   |        |       |       |       |       |        |       |       |       |       |
|----|---|---|--------|-------|-------|-------|-------|--------|-------|-------|-------|-------|
| 41 | 2 | 1 | 20,00  | 20,00 | 24,00 | 25,00 | 15,00 | 19,00  | 22,00 | 28,00 | 26,00 | 14,00 |
| 60 | 2 | 2 | 19,00  | 21,00 | 30,00 | 26,41 | 8,00  | 19,00  | 21,00 | 37,00 | 28,00 | 16,00 |
| 35 | 2 | 2 | 21,00  | 19,00 | 39,00 | 37,00 | 13,00 | 21,00  | 18,00 | 41,00 | 38,00 | 16,00 |
| 59 | 2 | 1 | 19,00  | 21,00 | 33,00 | 25,00 | 8,00  | 19,00  | 20,00 | 37,00 | 28,00 | 16,00 |
| 54 | 2 | 2 | 25,00  | 20,00 | 58,00 | 51,00 | 15,00 | 18,00  | 22,00 | 42,00 | 41,00 | 12,00 |
| 63 | 2 | 2 | 22,00  | 17,35 | 60,00 | 51,72 | 16,00 | 19,00  | 17,00 | 54,00 | 49,00 | 17,00 |
| 38 | 1 | 1 | 25,00  | 18,00 | 49,00 | 53,00 | 22,00 | 21,00  | 13,00 | 56,00 | 60,00 | 28,00 |
| 30 | 1 | 2 | 25,00  | 19,00 | 40,00 | 33,00 | 15,00 | 22,00  | 19,00 | 33,00 | 34,00 | 15,00 |
| 46 | 2 | 2 | 22,03  | 17,00 | 41,00 | 35,26 | 23,00 | 18,08* | 17,00 | 36,00 | 27,00 | 19,00 |
| 37 | 1 | 2 | 23,00  | 21,00 | 38,00 | 33,00 | 99*   | 20,00  | 20,00 | 29,00 | 34,22 | 99*   |
| 33 | 1 | 2 | 19,00  | 17,00 | 44,00 | 29,00 | 24,00 | 17,00  | 15,00 | 36,00 | 32,00 | 16,00 |
| 29 | 1 | 2 | 18,72* | 18,00 | 31,00 | 27,00 | 19,15 | 17,00  | 18,00 | 36,53 | 28,00 | 12,89 |
| 31 | 2 | 2 | 21,00  | 16,00 | 27,00 | 23,72 | 17,00 | 17,00  | 17,00 | 30,00 | 23,00 | 10,00 |
| 56 | 1 | 1 | 22,00  | 18,00 | 99*   | 99*   | 17,00 | 21,00  | 19,00 | 99*   | 99*   | 20,00 |

Note: random: 1 = Music therapy group; 2 = Control group; sex: 1 = female; 2 = male; \* = missing data
